# Supplementary material for: Exploring the Mystery of the Sweetness of Baijiu by Sensory Evaluation, Compositional Analysis and Multivariate Data Analysis
Source: MDPI journal article supplement (doi:10.3390/foods10112843), 2021-11-17
Supplement: s1 [file s1]

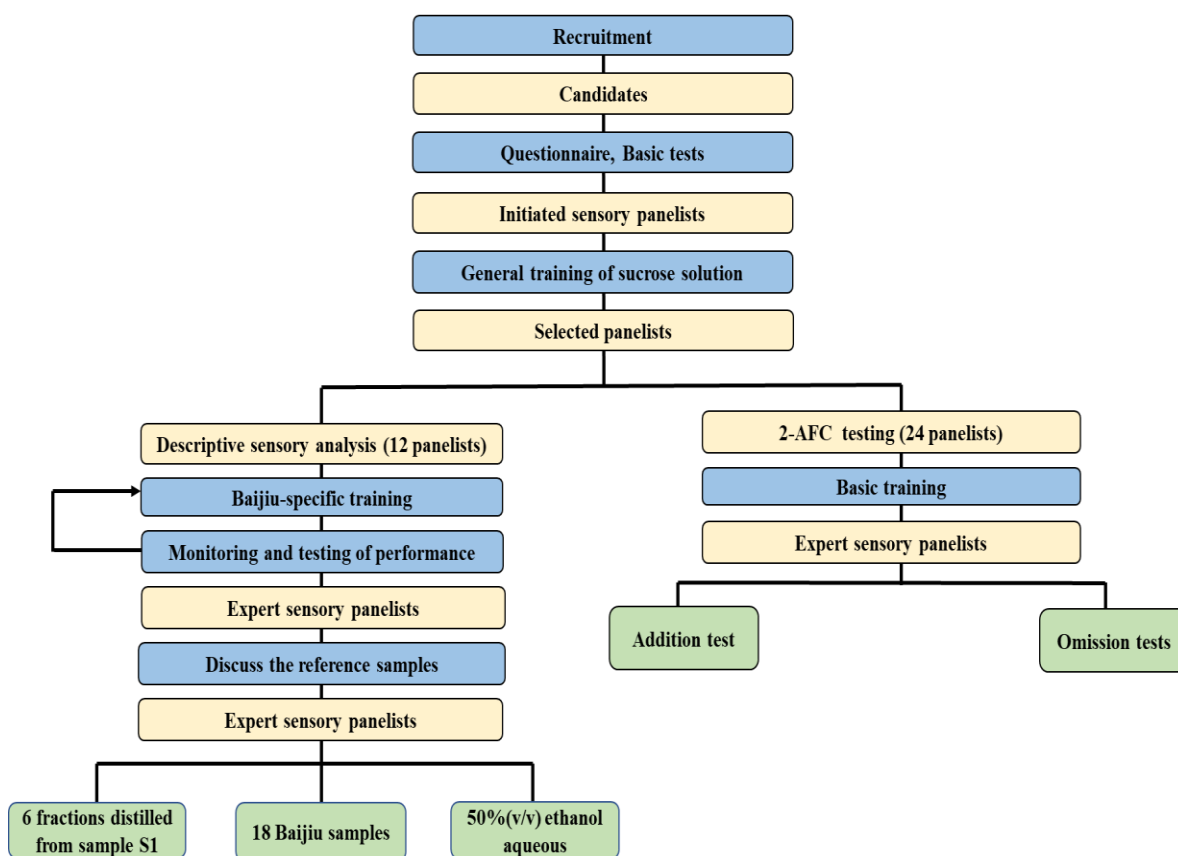

**Figure S1.** The entire process of sensory evaluation.

**Table S1.** Details relating to the 18 Baijiu test samples.

| Sample | Flavor type          | Original ethanol content<br>(%, v/v) | Dilution<br>factor | pH          | Origin           |
|--------|----------------------|--------------------------------------|--------------------|-------------|------------------|
| S1     | Strong flavor        | 68.8 ± 0.1                           | 1.4                | 3.60 ± 0.02 | Jiangsu, China   |
| S2     | Strong flavor        | 50.4 ± 0.1                           | 1.0                | 3.66 ± 0.01 | Jiangsu, China   |
| S3     | Strong flavor        | 50.2 ± 0.2                           | 1.0                | 3.58 ± 0.02 | Jiangsu, China   |
| S4     | Strong flavor        | 50.8 ± 0.1                           | 1.0                | 3.93 ± 0.02 | Jiangsu, China   |
| S5     | Strong flavor        | 67.3 ± 0.2                           | 1.3                | 3.59 ± 0.00 | Sichuan, China   |
| S6     | Strong flavor        | 52.8 ± 0.1                           | 1.1                | 3.55 ± 0.01 | Sichuan, China   |
| S7     | Strong flavor        | 52.0 ± 0.0                           | 1.0                | 3.63 ± 0.00 | Jiangsu, China   |
| S8     | Light-flavor         | 52.2 ± 0.1                           | 1.0                | 3.60 ± 0.01 | Shanxi, China    |
| S9     | Light-flavor         | 50.0 ± 0.0                           | 1.0                | 3.88 ± 0.01 | Chongqing, China |
| S10    | Light-flavor         | 54.0 ± 0.2                           | 1.1                | 3.99 ± 0.01 | Beijing, China   |
| S11    | Light-flavor         | 53.0 ± 0.0                           | 1.1                | 3.64 ± 0.01 | Shanxi, China    |
| S12    | Sauce-flavor         | 53.0 ± 0.1                           | 1.1                | 3.53 ± 0.00 | Guizhou, China   |
| S13    | Miscellaneous flavor | 53.0 ± 0.1                           | 1.1                | 3.70 ± 0.01 | Hubei, China     |
| S14    | Miscellaneous flavor | 53.0 ± 0.0                           | 1.1                | 3.74 ± 0.02 | Hubei, China     |
| S15    | Miscellaneous flavor | 53.0 ± 0.2                           | 1.1                | 3.75 ± 0.03 | Hubei, China     |
| S16    | Feng flavor          | 55.0 ± 0.1                           | 1.1                | 4.58 ± 0.02 | Shaanxi, China   |
| S17    | Te flavor            | 52.0 ± 0.2                           | 1.0                | 4.20 ± 0.01 | Jiangxi, China   |
| S18    | Medicine-flavor      | 54.0 ± 0.1                           | 1.1                | 3.58 ± 0.02 | Guizhou, China   |

**Table S2.** Analysis of variance of sweetness intensity data of the 18 Baijiu samples.

| Source                 | Degrees of<br>freedom | Sum of squares | Mean squares | F      | Pr(>F) <sup>a</sup>      |
|------------------------|-----------------------|----------------|--------------|--------|--------------------------|
| Sample                 | 17                    | 4299           | 252.89       | 74.029 | < 2e <sup>-16</sup> ***  |
| Panelist               | 11                    | 136            | 12.40        | 3.630  | 5.56e <sup>-05</sup> *** |
| Replication            | 3                     | 8              | 2.57         | 0.752  | 0.521                    |
| Sample × Panelist      | 187                   | 1023           | 5.47         | 1.601  | 2.05e <sup>-05</sup> *** |
| Sample × Replication   | 51                    | 208            | 4.09         | 1.196  | 0.173                    |
| Panelist × Replication | 33                    | 148            | 4.49         | 1.313  | 0.116                    |
| Residuals              | 561                   | 1916           | 3.42         |        |                          |

<sup>a</sup>Significance. codes: 0 '\*\*\*' 0.001 '\*\*' 0.01 '\*' 0.05 '.'

**Table S3.** Semi-quantitative analysis of aroma compounds in the four distilled fractions made from Baijiu sample S1.

| No.      | CAS        | RI(FFAP) | Compound                   | m/z | Concentration(ug·L <sup>-1</sup> ) <sup>a</sup> |                               |                             |                             |
|----------|------------|----------|----------------------------|-----|-------------------------------------------------|-------------------------------|-----------------------------|-----------------------------|
|          |            |          |                            |     | Fraction A                                      | Fraction B                    | Fraction C                  | Fraction D                  |
| Esters   |            |          |                            |     |                                                 |                               |                             |                             |
| 1        | 141-78-6   | 891      | Ethyl ethanoate            | 43  | 20085.97±1056.49 <sup>a</sup>                   | 1519.01±60.96 <sup>b</sup>    | nd <sup>c</sup>             | nd <sup>c</sup>             |
| 2        | 105-54-4   | 1044     | Ethyl butanoate            | 43  | 7221.81±833.98 <sup>a</sup>                     | 3493.25±158.96 <sup>b</sup>   | nd <sup>c</sup>             | nd <sup>c</sup>             |
| 3        | 108-64-5   | 1070     | Ethyl 3-methylbutanoate    | 88  | 1096.38±136.94 <sup>a</sup>                     | nd <sup>b</sup>               | nd <sup>b</sup>             | nd <sup>b</sup>             |
| 4        | 539-82-2   | 1128     | Ethyl pentanoate           | 57  | 4040.75±210.67 <sup>b</sup>                     | 4216.65±272.50 <sup>a</sup>   | 21.78±1.41 <sup>c</sup>     | 11.44±2.32 <sup>c</sup>     |
| 5        | 123-66-0   | 1227     | Ethyl hexanoate            | 88  | 54220.95±3298.92 <sup>a</sup>                   | 59366.58±2044.24 <sup>a</sup> | 5635.67±156.91 <sup>b</sup> | 1750.49±225.35 <sup>b</sup> |
| 6        | 106-27-4   | 1289     | Isoamyl butanoate          | 43  | 147.39±5.62 <sup>b</sup>                        | 238.23±1.23 <sup>a</sup>      | nd <sup>c</sup>             | nd <sup>c</sup>             |
| 7        | 142-92-7   | 1292     | Hexyl ethanoate            | 56  | 90.65±10.07 <sup>b</sup>                        | 103.68±5.32 <sup>a</sup>      | nd <sup>c</sup>             | nd <sup>c</sup>             |
| 8        | 626-77-7   | 1332     | Propyl hexanoate           | 99  | 1177.52±70.80 <sup>b</sup>                      | 1720.45±83.82 <sup>a</sup>    | nd <sup>c</sup>             | nd <sup>c</sup>             |
| 9        | 106-30-9   | 1326     | Ethyl heptanoate           | 88  | 6732.34±340.38 <sup>b</sup>                     | 9973.8±397.90 <sup>a</sup>    | 729.8±24.28 <sup>c</sup>    | 66.71±8.29 <sup>c</sup>     |
| 10       | 687-47-8   | 1351     | Ethyl 2-hydroxypropanoate  | 45  | nd <sup>b</sup>                                 | nd <sup>b</sup>               | nd <sup>b</sup>             | 2536.75±69.62 <sup>a</sup>  |
| 11       | 105-79-3   | 1363     | Isobutyl hexanoate         | 99  | 803.65±52.36 <sup>b</sup>                       | 1718.93±99.65 <sup>a</sup>    | nd <sup>c</sup>             | nd <sup>c</sup>             |
| 12       | 2050-09-1  | 1371     | Isopentyl pentanoate       | 70  | 159.17±17.17 <sup>b</sup>                       | 391.56±31.88 <sup>a</sup>     | nd <sup>c</sup>             | nd <sup>c</sup>             |
| 13       | 626-82-4   | 1422     | Butyl hexanoate            | 56  | 1517.52±104.50 <sup>b</sup>                     | 3551.86±130.25 <sup>a</sup>   | 73.75±1.94 <sup>c</sup>     | nd <sup>c</sup>             |
| 14       | 106-32-1   | 1438     | Ethyl octanoate            | 88  | 11035.85±429.93 <sup>b</sup>                    | 21243.45±584.92 <sup>a</sup>  | 2688.69±60.06 <sup>c</sup>  | 143.58±12.34 <sup>c</sup>   |
| 15       | 10032-13-0 | 1468     | Hexyl 3-methylbutanoate    | 85  | nd <sup>b</sup>                                 | 13.26±0.54 <sup>a</sup>       | nd <sup>b</sup>             | nd <sup>b</sup>             |
| 16       | 2198-61-0  | 1468     | Isoamyl hexanoate          | 85  | 23.18±1.20 <sup>b</sup>                         | 46.36±1.24 <sup>a</sup>       | 2.87±0.51 <sup>c</sup>      | nd <sup>c</sup>             |
| 17       | 540-07-8   | 1514     | Amyl hexanoate             | 70  | 236.49±16.95 <sup>b</sup>                       | 722.47±18.33 <sup>a</sup>     | nd <sup>c</sup>             | nd <sup>c</sup>             |
| 18       | 624-13-5   | 1521     | Propyl caprylate           | 43  | 16.54±0.64 <sup>a</sup>                         | nd <sup>b</sup>               | nd <sup>b</sup>             | nd <sup>b</sup>             |
| 19       | 123-29-5   | 1537     | Ethyl nominates            | 88  | 390.62±27.76 <sup>b</sup>                       | 1329.18±28.79 <sup>a</sup>    | nd <sup>c</sup>             | nd <sup>c</sup>             |
| 20       | 6946-90-3  | 1543     | Ethyl dl-2-hydroxycaproate | 69  | nd <sup>b</sup>                                 | 103.54±15.48 <sup>b</sup>     | 1725.28±330.35 <sup>a</sup> | 83.97±5.75 <sup>b</sup>     |
| 21       | 5461-06-3  | 1553     | Isobutyl octanoate         | 57  | 28.89±4.14 <sup>a</sup>                         | nd <sup>b</sup>               | nd <sup>b</sup>             | nd <sup>b</sup>             |
| 22       | 6378-65-0  | 1615     | Hexyl hexanoate            | 43  | 930.53±63.83 <sup>a</sup>                       | 35.35±0.76 <sup>c</sup>       | 508.96±27.41 <sup>b</sup>   | nd <sup>c</sup>             |
| 23       | 110-38-3   | 1641     | Ethyl decanoate            | 88  | 777.74±34.76 <sup>b</sup>                       | 2361.44±314.30 <sup>a</sup>   | nd <sup>c</sup>             | nd <sup>c</sup>             |
| 24       | 2035-99-6  | 1659     | Isoamyl octanoate          | 70  | 153.1±4.69 <sup>b</sup>                         | 639.85±79.74 <sup>a</sup>     | nd <sup>c</sup>             | nd <sup>c</sup>             |
| 25       | 76649-16-6 | 1668     | Ethyl trans-4-decenoate    | 88  | nd <sup>b</sup>                                 | 45.18±9.02 <sup>a</sup>       | nd <sup>b</sup>             | nd <sup>b</sup>             |
| 26       | 123-25-1   | 1680     | Ethyl succinate            | 101 | 13.04±0.84 <sup>b</sup>                         | 12.88±0.36 <sup>b</sup>       | 380.58±8.14 <sup>a</sup>    | 104.63±3.10 <sup>b</sup>    |
| 27       | 93-89-0    | 1685     | Ethyl benzene carboxylate  | 105 | 36.41±0.24 <sup>c</sup>                         | 267.13±20.68 <sup>b</sup>     | 415.55±67.92 <sup>a</sup>   | nd <sup>c</sup>             |
| 28       | 627-90-7   | 1739     | Ethyl undecanoate          | 88  | 19.2±0.27 <sup>b</sup>                          | 106.39±14.75 <sup>a</sup>     | nd <sup>c</sup>             | nd <sup>c</sup>             |
| 29       | 101-97-3   | 1798     | Ethyl 2-phenylethanoate    | 57  | 199.88±16.32 <sup>b</sup>                       | 1180.56±38.49 <sup>b</sup>    | 5251.01±995.04 <sup>a</sup> | 176.71±5.07 <sup>b</sup>    |
| 30       | 1117-55-1  | 1809     | Hexyl octanoate            | 43  | 104.88±4.43 <sup>b</sup>                        | 321.24±10.47 <sup>a</sup>     | nd <sup>c</sup>             | nd <sup>c</sup>             |
| 31       | 4887-30-3  | 1810     | Octyl hexanoate            | 117 | 65.68±2.66 <sup>a</sup>                         | nd <sup>b</sup>               | nd <sup>b</sup>             | nd <sup>b</sup>             |
| 32       | 106-33-2   | 1845     | Ethyl do decanoate         | 88  | 418.78±8.84 <sup>b</sup>                        | 758.27±21.18 <sup>a</sup>     | nd <sup>c</sup>             | nd <sup>c</sup>             |
| 33       | 39252-02-3 | 1871     | Furfuryl hexanoate         | 81  | nd <sup>c</sup>                                 | 128.05±4.11 <sup>b</sup>      | 432.19±79.68 <sup>a</sup>   | nd <sup>c</sup>             |
| 34       | 2021-28-5  | 1902     | Ethyl 3-phenylpropanoate   | 104 | 125.93±17.34 <sup>b</sup>                       | 689.13±23.26 <sup>b</sup>     | 2796.58±497.93 <sup>a</sup> | 133.56±6.46 <sup>b</sup>    |
| 35       | 28267-29-0 | 1942     | Ethyl redecorates          | 88  | 10.79±0.69 <sup>b</sup>                         | 29.14±0.75 <sup>a</sup>       | nd <sup>c</sup>             | nd <sup>c</sup>             |
| 36       | 103-52-6   | 1978     | 2-Phenylethyl butanoate    | 104 | nd <sup>b</sup>                                 | 41.95±2.64 <sup>b</sup>       | 312.93±54.08 <sup>a</sup>   | nd <sup>b</sup>             |
| 37       | 110-27-0   | 2031     | Isopropyl Myristate        | 43  | 8.18±1.25 <sup>a</sup>                          | nd <sup>b</sup>               | nd <sup>b</sup>             | nd <sup>b</sup>             |
| 38       | 124-06-1   | 2047     | Ethyl tetra decanoate      | 88  | 498.01±74.61 <sup>b</sup>                       | 989.71±114.12 <sup>a</sup>    | nd <sup>c</sup>             | nd <sup>c</sup>             |
| 39       | 2050-23-9  | 2112     | Diethyl suberate           | 143 | nd <sup>c</sup>                                 | nd <sup>c</sup>               | 8.04±1.07 <sup>a</sup>      | 2.89±0.37 <sup>b</sup>      |
| 40       | 41114-00-5 | 2150     | Ethyl pentadecanoate       | 88  | 36.42±0.89 <sup>b</sup>                         | 68.39±4.32 <sup>a</sup>       | 44.8±4.27 <sup>b</sup>      | 6.98±0.31 <sup>c</sup>      |
| 41       | 6290-37-5  | 2184     | 2-Phenethyl hexanoate      | 104 | 72.46±12.72 <sup>c</sup>                        | 317.02±32.90 <sup>b</sup>     | 1561.53±204.19 <sup>a</sup> | 62.68±1.31 <sup>c</sup>     |
| 42       | 628-97-7   | 2256     | Ethyl hex decanoate        | 88  | 985.57±21.03 <sup>b</sup>                       | 1442.01±151.68 <sup>a</sup>   | 939.96±175.16 <sup>b</sup>  | 301.91±20.40 <sup>c</sup>   |
| 43       | 54546-22-4 | 2285     | Ethyl 9-hexadecenoate      | 55  | 11.26±0.51 <sup>b</sup>                         | 23.18±1.71 <sup>a</sup>       | 28.5±1.61 <sup>a</sup>      | nd <sup>c</sup>             |
| 44       | 111-62-6   | 2480     | Ethyl Oleate               | 43  | 12.14±0.44 <sup>a</sup>                         | 14.78±0.41 <sup>a</sup>       | 27.9±2.37 <sup>a</sup>      | 6.58±0.56 <sup>a</sup>      |
| 45       | 544-35-4   | 2530     | Ethyl linoleate            | 67  | 39.72±1.94 <sup>a</sup>                         | 45.48±1.65 <sup>a</sup>       | 53.98±7.43 <sup>a</sup>     | 22.35±2.54 <sup>a</sup>     |
| 46       | 84-69-5    | 2567     | Di isobutyl phthalate      | 149 | 89.5±1.98 <sup>c</sup>                          | 91.67±3.08 <sup>c</sup>       | 413.53±5.75 <sup>a</sup>    | 220.78±23.80 <sup>b</sup>   |
| 47       | 84-74-2    | 2716     | Dibutyl phthalate          | 76  | 1.79±0.44 <sup>b</sup>                          | 3.01±0.15 <sup>b</sup>        | 7.36±0.21 <sup>a</sup>      | 7.54±0.64 <sup>a</sup>      |
| Alcohols |            |          |                            |     |                                                 |                               |                             |                             |
| 48       | 71-36-3    | 1161     | 1-Butanol                  | 56  | 89.08±0.00 <sup>c</sup>                         | 424.42±13.46 <sup>b</sup>     | 694.58±131.18 <sup>a</sup>  | nd <sup>c</sup>             |
| 49       | 123-51-3   | 1213     | Isopentyl alcohol          | 55  | nd <sup>b</sup>                                 | 1588.65±99.95 <sup>a</sup>    | 2026.48±322.82 <sup>a</sup> | 74.92±9.64 <sup>b</sup>     |
| 50       | 71-41-0    | 1253     | 1-Pentanol                 | 42  | nd <sup>b</sup>                                 | nd <sup>b</sup>               | 207.64±40.28 <sup>a</sup>   | nd <sup>b</sup>             |
| 51       | 543-49-7   | 1322     | 2-Heptanol                 | 45  | 75.05±3.33 <sup>c</sup>                         | 582.66±36.68 <sup>b</sup>     | 904.72±164.29 <sup>a</sup>  | nd <sup>c</sup>             |
| 52       | 111-27-3   | 1355     | 1-Hexanol                  | 56  | 412.19±14.98 <sup>bc</sup>                      | 1205.97±40.30 <sup>b</sup>    | 3497.12±641.37 <sup>a</sup> | nd <sup>c</sup>             |
| 53       | 104-76-7   | 1493     | 2-Ethylhexanol             | 57  | nd <sup>b</sup>                                 | 27.42±2.54 <sup>a</sup>       | nd <sup>b</sup>             | nd <sup>b</sup>             |
| 54       | 111-87-5   | 1557     | 1-Octanol                  | 56  | nd <sup>c</sup>                                 | 248.53±6.50 <sup>b</sup>      | 887.95±18.30 <sup>a</sup>   | nd <sup>c</sup>             |
| 55       | 60-12-8    | 1927     | Phenylethyl Alcohol        | 91  | 13.09±2.60 <sup>c</sup>                         | nd <sup>c</sup>               | 164.34±29.05 <sup>b</sup>   | 455.18±17.12 <sup>a</sup>   |
| 56       | 112-53-8   | 1962     | Dodecanal                  | 55  | 54.22±7.06 <sup>a</sup>                         | 21.01±3.53 <sup>b</sup>       | nd <sup>c</sup>             | nd <sup>c</sup>             |
| Acids    |            |          |                            |     |                                                 |                               |                             |                             |
| 57       | 64-19-7    | 1451     | Acetic acid                | 43  | 102.75±3.01 <sup>b</sup>                        | nd <sup>c</sup>               | nd <sup>c</sup>             | 1082.69±24.16 <sup>a</sup>  |
| 58       | 20286-44-6 | 1503     | 1-Methylheptvl butyrate    | 71  | nd <sup>b</sup>                                 | 97.42±3.50 <sup>a</sup>       | nd <sup>b</sup>             | nd <sup>b</sup>             |

|                              |            |      |                         |     |                             |                            |                               |                              |
|------------------------------|------------|------|-------------------------|-----|-----------------------------|----------------------------|-------------------------------|------------------------------|
| 59                           | 79-09-4    | 1540 | Propanoic acid          | 74  | nd <sup>b</sup>             | nd <sup>b</sup>            | nd <sup>b</sup>               | 44.8±0.62 <sup>a</sup>       |
| 60                           | 107-92-6   | 1629 | Butanoic acid           | 58  | 27.51±0.7 <sup>c</sup>      | nd <sup>c</sup>            | 883.6±61.16 <sup>b</sup>      | 1599.08±24.63 <sup>a</sup>   |
| 61                           | 503-74-2   | 1669 | Isovaleric acid         | 60  | nd <sup>c</sup>             | nd <sup>c</sup>            | 508.52±93.33 <sup>a</sup>     | 339.69±5.08 <sup>b</sup>     |
| 62                           | 109-52-4   | 1738 | Valeric acid            | 60  | nd <sup>b</sup>             | nd <sup>b</sup>            | 1312.61±243.72 <sup>a</sup>   | 1308.46±18.25 <sup>a</sup>   |
| 63                           | 646-07-1   | 1804 | 4-Methylpentanoic acid  | 57  | nd <sup>b</sup>             | nd <sup>b</sup>            | nd <sup>b</sup>               | 50.72±0.40 <sup>a</sup>      |
| 64                           | 142-62-1   | 1857 | Hexanoic acid           | 60  | 1105.99±201.61 <sup>c</sup> | 1355.58±85.97 <sup>c</sup> | 14230.18±2014.07 <sup>a</sup> | 10109.27±328.41 <sup>b</sup> |
| 65                           | 149-57-5   | 1945 | Ethylhexoic acid        | 73  | 14±0.72 <sup>a</sup>        | nd <sup>b</sup>            | nd <sup>b</sup>               | nd <sup>b</sup>              |
| 66                           | 111-14-8   | 1953 | Heptanoic acid          | 60  | 48.13±1.67 <sup>c</sup>     | 114.07±4.45 <sup>c</sup>   | 3000.8±434.97 <sup>a</sup>    | 1597.18±42.63 <sup>b</sup>   |
| 67                           | 124-07-2   | 2066 | Octanoic Acid           | 60  | 181.89±7.79 <sup>c</sup>    | 428.36±15.14 <sup>c</sup>  | 6222.28±749.81 <sup>a</sup>   | 2671.36±166.61 <sup>b</sup>  |
| 68                           | 112-05-0   | 2169 | Nonanoic acid           | 60  | nd <sup>c</sup>             | nd <sup>c</sup>            | 590.86±59.33 <sup>a</sup>     | 157.87±27.45 <sup>b</sup>    |
| 69                           | 334-48-5   | 2277 | n-Decanoic acid         | 60  | 7.46±0.30 <sup>c</sup>      | 20.12±0.70 <sup>c</sup>    | 759.05±22.39 <sup>a</sup>     | 287.65±54.26 <sup>b</sup>    |
| 70                           | 112-37-8   | 2382 | Undecanoic acid         | 60  | nd <sup>c</sup>             | nd <sup>c</sup>            | 10.48±0.54 <sup>a</sup>       | 4.08±0.48 <sup>b</sup>       |
| 71                           | 65-85-0    | 2457 | Benzene carboxylic acid | 105 | nd <sup>b</sup>             | 2.06±0.85 <sup>b</sup>     | 10.71±0.35 <sup>a</sup>       | 10.6±1.56 <sup>a</sup>       |
| 72                           | 143-07-7   | 2488 | Dodecanoic acid         | 73  | nd <sup>c</sup>             | nd <sup>c</sup>            | 87.77±1.83 <sup>a</sup>       | 36.08±5.51 <sup>b</sup>      |
| <b>Aldehydes and Ketones</b> |            |      |                         |     |                             |                            |                               |                              |
| 73                           | 124-13-0   | 1329 | Octanal                 | 43  | nd <sup>b</sup>             | 22.12±2.45 <sup>a</sup>    | nd <sup>b</sup>               | nd <sup>b</sup>              |
| 74                           | 124-19-6   | 1393 | Nonanal                 | 57  | 50.16±4.40 <sup>b</sup>     | 145.64±5.92 <sup>a</sup>   | nd <sup>b</sup>               | 9.34±0.19 <sup>b</sup>       |
| 75                           | 112-31-2   | 1512 | Decanal                 | 43  | nd <sup>b</sup>             | 16.45±0.96 <sup>a</sup>    | nd <sup>b</sup>               | nd <sup>b</sup>              |
| 76                           | 100-52-7   | 1541 | Benzoic aldehyde        | 77  | nd <sup>c</sup>             | 65.09±2.06 <sup>b</sup>    | 134.63±22.82 <sup>a</sup>     | nd <sup>c</sup>              |
| 77                           | 18829-56-6 | 1552 | (2E)-2-Nonenal          | 43  | nd <sup>b</sup>             | 28.34±2.94 <sup>a</sup>    | nd <sup>b</sup>               | nd <sup>b</sup>              |
| 78                           | 821-55-6   | 1400 | 2-Nonanone              | 43  | 54.51±6.46 <sup>b</sup>     | 255.64±7.87 <sup>a</sup>   | nd <sup>b</sup>               | nd <sup>b</sup>              |
| 79                           | 112-12-9   | 1605 | 2-Undecanone            | 58  | 18.18±0.61 <sup>b</sup>     | 117.25±20.17 <sup>a</sup>  | nd <sup>b</sup>               | nd <sup>b</sup>              |
| 80                           | 2345-28-0  | 2022 | 2-Pentadecanone         | 58  | 13.39±1.66 <sup>b</sup>     | 30.41±3.25 <sup>a</sup>    | nd <sup>c</sup>               | nd <sup>c</sup>              |
| <b>Furans</b>                |            |      |                         |     |                             |                            |                               |                              |
| 81                           | 3777-69-3  | 1216 | 2-Amylfuran             | 81  | 24.87±3.17 <sup>b</sup>     | nd <sup>c</sup>            | nd <sup>c</sup>               | 91.43±2.07 <sup>a</sup>      |
| 82                           | 98-01-1    | 1478 | Furfural                | 96  | 30.55±2.07 <sup>b</sup>     | nd <sup>b</sup>            | 694.32±110.50 <sup>a</sup>    | 45.12±3.64 <sup>b</sup>      |
| 83                           | 98-00-0    | 1666 | 2-Furanmethanol         | 98  | nd <sup>b</sup>             | nd <sup>b</sup>            | nd <sup>b</sup>               | 10.82±0.34 <sup>a</sup>      |
| <b>Phenols</b>               |            |      |                         |     |                             |                            |                               |                              |
| 84                           | 108-95-2   | 2017 | Phenol                  | 94  | nd <sup>b</sup>             | nd <sup>b</sup>            | nd <sup>b</sup>               | 79.64±1.73 <sup>a</sup>      |
| 85                           | 106-44-5   | 2096 | 4-Methylphenol          | 107 | 11.34±2.24 <sup>c</sup>     | nd <sup>c</sup>            | 154.99±27.38 <sup>b</sup>     | 215.51±6.81 <sup>a</sup>     |
| 86                           | 123-07-9   | 2188 | 4-Ethylphenol           | 107 | nd <sup>b</sup>             | nd <sup>b</sup>            | 163.92±28.48 <sup>a</sup>     | 149.06±6.77 <sup>a</sup>     |
| <b>Terpenes</b>              |            |      |                         |     |                             |                            |                               |                              |
| 87                           | 3796-70-1  | 1873 | Geranyl acetone         | 43  | nd <sup>b</sup>             | nd <sup>b</sup>            | 85.39±14.23 <sup>a</sup>      | nd <sup>b</sup>              |
| 88                           | 77-53-2    | 2143 | Cedrol                  | 95  | nd <sup>b</sup>             | nd <sup>b</sup>            | 4.64±0.90 <sup>a</sup>        | 3.41±0.17 <sup>a</sup>       |

Values of the concentration are the mean ± SD.

<sup>a</sup>The different letters indicate significant differences at  $p < 0.05$ .

**Table S4.** Semi-quantitative analysis of 43 potential sweet compounds in 18 Baijiu samples with different sweetness intensities.

| N<br>O. | RI       | CA<br>S            | Compo<br>und                                     | m/<br>z | Concentration(ug·L <sup>-1</sup> ) |         |        |        |        |         |        |        |        |         |        |        |        |        |           |        |        |        |
|---------|----------|--------------------|--------------------------------------------------|---------|------------------------------------|---------|--------|--------|--------|---------|--------|--------|--------|---------|--------|--------|--------|--------|-----------|--------|--------|--------|
|         |          |                    |                                                  |         | S1                                 | S2      | S3     | S4     | S5     | S6      | S7     | S8     | S9     | S10     | S11    | S12    | S13    | S14    | S15       | S16    | S17    | S18    |
| 1       | 89<br>1  | 141-<br>78-6       | Ethyl<br>ethanoa<br>te <sup>a</sup>              | /       | 120585                             | 829359  | 969337 | 947989 | 111319 | 772407  | 26566  | 126337 | 50546  | 87290   | 122512 | 129917 | 775979 | 540356 | 782134    | 107249 | 90404  | 150527 |
|         |          |                    |                                                  |         | 7.62±2                             | .82±40  | .05±12 | .58±66 | 4.03±4 | .14±83  | 5.57±1 | 2.6±13 | 7.9±21 | 4.4±61  | 7.58±3 | 4.54±1 | .1±651 | .33±35 | .11±62    | 0.17±6 | 3.11±5 | 4.99±2 |
|         |          |                    |                                                  |         | 7892.8                             | 308.58  | 1040.5 | 332.47 | 2992.4 | .047.14 | 2708.0 | 3984.5 | 7.9±21 | 4.4±61  | 6946.8 | 10150. | 42.53  | 544.47 | 283.81    | 7698.6 | 8593.8 | 19095. |
| 2       | 10<br>44 | 105-<br>54-4       | Ethyl<br>butanoa<br>te <sup>a</sup>              | /       | 287517                             | 90803.  | 199196 | 232784 | 215342 | 172021  | 11064  | 5334.5 | 5407.7 | 73168.3 | 6563.1 | 91055. | 80102. | 57418. | 84085.    | 55655. | 49141. | 310291 |
|         |          |                    |                                                  |         | .99±78                             | 01±911  | .41±51 | .54±41 | .04±20 | .19±23  | 8.17±7 | 8±630. | 9±128  | 8±627.  | 7±835. | 58±772 | 17±245 | 583±11 | 11909±157 | 3±7895 | 66±78  | .93±46 |
|         |          |                    |                                                  |         | 61.45                              | 5.10    | 135.19 | 050.71 | 094.10 | 181.83  | 721.29 | 06     | 0.04   | 390     | 42     | 3.21   | 19.71  | 72.84  | 3.70      | .56    | 80.31  | 098.44 |
| 3       | 12<br>27 | 123-<br>66-0       | Ethyl<br>hexano<br>ate <sup>a</sup>              | /       | 404080                             | 161495  | 232046 | 236999 | 282573 | 161751  | 45294  | 677236 | 41914  | 53150   | 806470 | 452861 | 592658 | 983420 | 104779    | 116722 | 83709  | 114647 |
|         |          |                    |                                                  |         | 7.69±7                             | 5.08±1  | 2.26±3 | 6.34±4 | 6.19±8 | 6.59±1  | 8.59±8 | .82±59 | 2.44±1 | 1.14±2  | .83±51 | .58±45 | .11±13 | .44±21 | 6.87±2    | 0.05±5 | 5.97±8 | 5.69±2 |
|         |          |                    |                                                  |         | 1354.7                             | 76053.  | 55850. | 86257. | 9503.3 | 49462.  | 6368.4 | .82±59 | 2.44±1 | 1.14±2  | .83±51 | .58±45 | 2051.2 | 3812.3 | 63527.    | 4529.2 | 7450.5 | 17832. |
| 4       | 10<br>59 | 108-<br>64-5       | Ethyl 3-<br>methyl<br>butanoa<br>te <sup>b</sup> | 88      | 103973                             | 38994.  | 55235. | 90095. | 50750. | 41648.  | 16307. | 10943. | 1002.2 | 1709.8  | 7213.0 | 35952. | 44267. | 25607. | 29691.    | 6259.9 | 31536. | 44046. |
|         |          |                    |                                                  |         | .73±42                             | 7±8138  | 66±357 | 27±850 | 62±150 | 03±147  | 04±36  | 04±520 | 5±55.0 | 8±979.  | 6±328. | 64±645 | 97±193 | 83±143 | 96±751    | 5±98.2 | 73±57  | 29±334 |
|         |          |                    |                                                  |         | 384.21                             | .37     | 7.19   | 7.42   | 8.18   | 82.18   | 54.62  | 4.76   | 2      | 45      | 64     | 0.95   | 2.8    | 0.55   | 4.4       | 2      | 2.00   | 6.35   |
| 5       | 11<br>36 | 539-<br>82-2       | Ethyl<br>pentano<br>ate <sup>b</sup>             | 88      | 273635                             | 107840  | 146842 | 157639 | 244202 | 128939  | 59820. | 18211. | 3145.9 | 13294.  | 10206. | 32402. | 59117. | 89963. | 66227.    | 83225. | 42281. | 58267. |
|         |          |                    |                                                  |         | .83±60                             | .5±459  | .4±125 | .03±16 | .36±12 | .85±84  | 6±999  | 93±632 | 7±120. | 96±69   | 6±4490 | 71±204 | 43±157 | 39±116 | 95±841    | 73±133 | 48±41  | 49±105 |
|         |          |                    |                                                  |         | 085.17                             | 66.07   | 28.79  | 299.87 | 84.66  | 170.05  | 7.16   | 6.23   | 32     | 06.69   | .12    | 0.14   | 8.66   | 57.99  | 9.60      | 8.77   | 50.48  | 3.11   |
| 6       | 13<br>91 | 821-<br>55-6       | Nonano<br>ne <sup>b</sup>                        | 43      | 14±368                             | 72±118  | 12±590 | 74±109 | 25±456 | 81±188  | 23±41  | 4±295. | 727.28 | 9835.5  | 3658.7 | 13321. | 51023. | 50864. | 48745.    | 24549. | 23049. | 9100.9 |
|         |          |                    |                                                  |         | .51                                | 9.54    | .99    | 48.54  | 0.36   | 4.39    | 78.92  | 24     | ±16.31 | 91      | 68     | 4.58   | 4.2    | 8.71   | 3.44      | .18    | 4.24   | .05    |
|         |          |                    |                                                  |         | 21108.                             | 17452.  | 40288. | 40353. | 29102. | 13144.  | 2710.7 | 399.14 | 3322.6 | 1261.9  | 3050.2 | 13706. | 10171. | 11442. | 24238.    | 19367. | nd     |        |
| 7       | 12<br>92 | 106-<br>27-4       | Isoamyl<br>butanoa<br>te <sup>b</sup>            | 71      | 74±306                             | 36±218  | 98±289 | 07±376 | 57±191 | 22±657  | nd     | 7±155. | 399.14 | 6±181.  | 7±548. | 8±152. | 19±685 | 8±5085 | 17±279    | 69±202 | 3±719  | nd     |
|         |          |                    |                                                  |         | 1.54                               | 0.6     | .16    | 4.90   | .57    | 2.11    | 70     | ±8.80  | 40     | 91      | 14     | 3.1    | .90    | 4.67   | 3.98      | 6.63   |        |        |
|         |          |                    |                                                  |         | 9454.8                             | 5606.9  | 10101. | 12889. | 3481.3 | 3988.0  | 747.94 | ±32.91 | 1317.9 | 1649.8  | 3457.7 | 1005.7 | 1760.3 | 2132.4 | 2933.0    | 1851.1 | 19167. | 16076. |
| 8       | 12<br>96 | 142-<br>92-7       | Hexyl<br>ethanoa<br>te <sup>b</sup>              | 61      | 4±1271                             | 3±1272  | 26±505 | 15±186 | 4±137. | 7±616.  | ±32.91 | 5±798. | 4±77.2 | 1±130   | 3±403. | 1±401. | 5±428. | 3±539. | 9±228.    | 15±157 | 8±559. | ±2499. |
|         |          |                    |                                                  |         | .38                                | .28     | 0.63   | 9.29   | 36     | 35      | 69     | 8      | 8.23   | 86      | 81     | 74     | 18     | 49     | 6.86      | 77     | 74     |        |
|         |          |                    |                                                  |         | 2110.6                             | 3129.5  | 6198.5 | 9045.7 | 13122. | 1965.8  | 2283.3 | 1249.6 | 412.5± | 1369.0  | 1521.5 | 1392.7 | 4093.1 | 2574.9 | 2295.2    | 6862.1 | 5273.0 | 1669±2 |
| 9       | 13<br>04 | 124-<br>13-0       | Octanal<br>b                                     | 43      | 2±1614                             | 6±420.  | 3±32.8 | 2±663. | 19±289 | 5±908.  | 8±149. | 9±684. | 412.5± | 6±79.6  | 1±342. | ±209.3 | 1±1432 | 8±372. | ±833.0    | 3±249. | 5±543. | 37.27  |
|         |          |                    |                                                  |         | .69                                | 50      | 0      | 27     | 1.63   | 23      | 10     | 78     | 194.11 | 1       | 88     | 1      | .78    | 18     | 3         | 25     | 55     |        |
|         |          |                    |                                                  |         | 25573.                             | 29200.  | 46041. | 39038. | 17771. | 10775.  | 7397.9 | 2443.6 | 289.59 | 1996.5  | 736.74 | 10063. | 26510. | 25263. | 23320.    | 40524. | 28710. | 81365. |
| 10      | 13<br>28 | 626-<br>77-7       | Propyl<br>hexano<br>ate <sup>b</sup>             | 99      | 41±134                             | 19±639  | 1±9566 | 49±154 | 74±457 | 54±202  | 2±108  | 9±112. | ±143.2 | 9±780.  | 736.74 | 41±249 | 96±96. | 26±339 | 29±365    | 16±415 | 26±19  | 92±182 |
|         |          |                    |                                                  |         | 9.54                               | 8.38    | .31    | 5.32   | 0.6    | 8.41    | 8.00   | 44     | 0      | 68      | ±12.36 | 7.15   | 19     | 6.74   | 6.49      | 8.51   | 07.60  | 8.80   |
|         |          |                    |                                                  |         | 93496.                             | 97719.  | 135582 | 105237 | 62212. | 44657.  | 44659. | 13244. | 1373.7 | 8712.2  | 8543.5 | 16070. | 43896. | 42750. | 37335.    | 89767. | 33926. | 47560. |
| 11      | 13<br>43 | 106-<br>30-9       | Ethyl<br>heptano<br>ate <sup>b</sup>             | 60      | 91±170                             | 99±223  | .61±16 | .82±36 | 53±110 | 91±688  | 58±35  | 44±532 | 7±191. | 9±243   | 1±218. | 09±459 | 54±180 | 47±362 | 55±272    | 18±377 | 6±238  | 6±1229 |
|         |          |                    |                                                  |         | 4.00                               | 14.40   | 375.89 | 784.79 | 0.12   | 2.55    | 00.02  | 2.67   | 7      | 9.55    | 04     | .33    | 0.14   | 9.95   | 0.02      | 8.92   | 3.89   | 8.81   |
|         |          |                    |                                                  |         | 26063.                             | 26075.  | 43837. | 34446. | 22843. | 12608.  | 6895.8 | 2293.9 | 270.8± | 1128.6  | 750.21 | 3478.8 | 16421. | 14540. | 14083.    | 32851. | 22621. | 21413. |
| 12      | 13<br>57 | 105-<br>79-3       | Isobuty<br>l<br>hexano<br>ate <sup>b</sup>       | 99      | 24±395                             | 76±380  | 74±820 | 64±318 | 49±421 | 68±521  | 1±675. | 3±106. | 3.54   | 3±438.  | 750.21 | 7±630. | 85±105 | 43±246 | 45±909    | 27±169 | 81±11  | 26±306 |
|         |          |                    |                                                  |         | 8.60                               | 7.35    | 6.31   | 4.22   | 7.53   | 5.30    | 81     | 40     |        | 38      | ±30    | 06     | 2.74   | 6.21   | .65       | 3.59   | 20.85  | 1.97   |
|         |          |                    |                                                  |         | 12799.                             | 10034.  | 25692. | 17941. | 9144.0 | 5055.7  | 1237.1 | 652.3± | nd     | 521.06  | 245.63 | 3835.2 | 6214.0 | 4650.2 | 5293.1    | 13800. | 13826. | 17915. |
| 13      | 13<br>63 | 2050<br>-09-<br>1  | Isopent<br>yl<br>pentano<br>ate <sup>b</sup>     | 70      | 03±463                             | 81±893  | 8±6198 | 24±448 | 4±103. | 7±1544  | 6±86.1 | 36.89  | nd     | 521.06  | 245.63 | 3±424. | 9±1100 | 1±204. | 8±536.    | 14±288 | 6±860. | 02±226 |
|         |          |                    |                                                  |         | .10                                | .32     | .59    | .05    | 56     | .64     | 7      |        | ±18.68 | ±79.13  | 75     | .33    | 42     | 39     | .78       | 90     | 0.69   |        |
|         |          |                    |                                                  |         | 9411.1                             | 8071.9  | 13810. | 10747. | 8679.7 | 4441.1  | 6614.7 | 6746.9 | 2699.6 | 67824.0 | 8829.2 | 8485.2 | 8528.6 | 7011.7 | 8800.2    | 25211. | 14082  | 8513.4 |
| 14      | 13<br>95 | 124-<br>19-6       | Nonana<br>lb                                     | 57      | 5±596.                             | 2±610.  | 47±262 | 01±960 | 2±831. | 7±167.  | ±571.3 | ±2026. | 8±157. | 2±571.  | 2±213. | 5±401. | 6±788. | 4±379. | ±405.6    | 96±321 | ±711.7 | 8±175. |
|         |          |                    |                                                  |         | 47                                 | 85      | 5.39   | .53    | 12     | 94      | 3      | 72     | 09     | 60      | 78     | 65     | 18     | 69     | 8         | 9.7    | 0      | 66     |
|         |          |                    |                                                  |         | 27877.                             | 84920.  | 144926 | 92627. | 56009. | 37764.  | 17112. | 8223.5 | 232.36 | 3439.8  | 1287.8 | 15379. | 21836. | 28845. | 22142.    | 114250 | 48996. | 75786. |
| 15      | 14<br>14 | 626-<br>82-4       | Butyl<br>hexano<br>ate <sup>b</sup>              | 56      | 91±119                             | 94±820. | .07±28 | 74±294 | 93±512 | 45±129  | 54±23  | ±240.3 | 232.36 | 8±139.  | 3±40.9 | 81±73. | 22±142 | 48±482 | 39±263.   | 3±427  | 55±19  | 78±168 |
|         |          |                    |                                                  |         | 75.98                              | 9.42    | 696.18 | 1.25   | 9.54   | 5.00    | 44.49  | 1      | ±14.93 | 35      | 5      | 80     | 2.27   | 3.25   | 9.79      | 6.13   | 36.32  | 9.36   |
|         |          |                    |                                                  |         | 268979                             | 124083  | 188047 | 173904 | 109299 | 105666  | 13846  | 105551 | 57547. | 80818.  | 61551. | 86453. | 105963 | 135296 | 128515    | 183714 | 14288  | 117288 |
| 16      | 14<br>35 | 106-<br>32-1       | Ethyl<br>octanoa<br>te <sup>b</sup>              | 88      | ±45504                             | .66±37  | .88±60 | .02±14 | .5±235 | .06±15  | 5.42±2 | .99±54 | 26±17  | 73±29   | 94±109 | 98±375 | .95±13 | .22±15 | .32±11    | .64±44 | 4317.6 | 41±34  |
|         |          |                    |                                                  |         | .87                                | 604.64  | 977.22 | 149.54 | 54.79  | 398.74  | 7657.9 | 476.88 | 901.17 | 967.69  | 3.51   | 52.99  | 563.72 | 157.88 | 111.00    | 887.10 | 3      | 292.16 |
|         |          |                    |                                                  |         | 959.98                             | 727.22  | nd     | 1535.4 | 545.13 | 2541.3  | 73.62± | 19.62± | nd     | nd      | nd     | 175.72 | 321.4± | 1336.0 | 246.66    | 5109.7 | 656.05 | 2469.7 |
| 17      | 14<br>41 | 1003<br>2-<br>13-0 | 3-<br>methyl<br>butanoa<br>te <sup>b</sup>       | 85      | ±39.56                             | ±26.46  | nd     | 3±166. | ±122.8 | 6±501.  | 0.13   | 1.21   | nd     | nd      | nd     | ±16.94 | 14.23  | 9±271. | ±29.46    | 4±284. | 5109.7 | 656.05 |
|         |          |                    |                                                  |         |                                    |         |        | 34     | 7      | 06      |        |        |        |         |        |        |        |        |           | 92     | ±27.52 | 6±172. |
|         |          |                    |                                                  |         |                                    |         |        |        |        |         |        |        |        |         |        |        |        |        |           |        |        |        |

|    |    |                                                               |         |                        |                          |                          |                         |                          |                        |                        |                        |                  |                       |                        |                         |                         |                         |                         |                         |                        |                        |
|----|----|---------------------------------------------------------------|---------|------------------------|--------------------------|--------------------------|-------------------------|--------------------------|------------------------|------------------------|------------------------|------------------|-----------------------|------------------------|-------------------------|-------------------------|-------------------------|-------------------------|-------------------------|------------------------|------------------------|
| 18 | 14 | 2198 Isoamyl<br>-61- hexano<br>0 ate <sup>b</sup>             | 43      | 15±255<br>4.7          | 02±112<br>6.16           | 1±1701<br>.99            | 53±167<br>2.50          | 43±132<br>6.2            | 59±576<br>5.6          | 9±175<br>3.98          | 28±420<br>5.63         | 779.7±<br>165.89 | 5175.3<br>75          | 4379.9<br>91           | 12624.<br>3.61          | 47049.<br>6.85          | 43474.<br>3.51          | 45063.<br>1.98          | 38550.<br>9.19          | 29938.<br>05.22        | 53075.<br>7.4          |
| 19 | 14 | 104-<br>80 76-7 Ethylhe<br>xanol <sup>b</sup>                 | 57      | 6±331.<br>13           | 4±164.<br>69             | 1±3.16<br>1±3.16         | 95±621<br>.02           | 8±227.<br>06             | 8±263.<br>42           | 879.59<br>±79.94       | 1326.8<br>6±450.<br>73 | 1054±<br>383.08  | 1343.8<br>9±106.      | 4662.9<br>8±433.       | 2279.9<br>6±126.        | 1273.8<br>±67.12        | 1417.1<br>8±60.5        | 1345.1<br>±94.13        | 1589.1<br>3±69.8        | 2629.1<br>3±99.1       | 1021.0<br>3±20.3       |
| 20 | 14 | 2028 Methyl<br>6- heptyl<br>89 44-6 butyrat<br>e <sup>b</sup> | 71      | nd                     | 5330.8<br>2±307.<br>54   | nd                       | 1038.3<br>1±162.<br>92  | 7470.3<br>1±100.<br>27   | 206.76<br>±10.49       | 2485.1<br>2±325.<br>59 | 225.31<br>±10.36       | nd               | nd                    | nd                     | nd                      | 448.7±<br>22.35         | 2403.6<br>3±58.0<br>7   | nd                      | 898.7±<br>15.38         | 701.28<br>±350.6<br>4  | 560.97<br>±36.65       |
| 21 | 14 | 112-Decanal<br>97 31-2 b                                      | 43      | 2219.2<br>2±16.7<br>3  | 2019.6<br>2±25.9<br>6    | 2295.3<br>1±114.<br>66   | 4036.7<br>9±422.<br>99  | 1837.9<br>2±23.0<br>3    | 1261.2<br>6±212.<br>58 | 1143.0<br>3±11.0<br>5  | 1925.3<br>5±694.<br>88 | 493.92<br>±37.43 | 1322.9<br>8±183.      | 1806.1<br>7±162.<br>77 | 1535.4<br>7±168.<br>91  | 3118.2<br>8±94.3<br>1   | 2181.7<br>3±241.<br>51  | 2618.3<br>4±175.<br>38  | 4465.4<br>5±238.<br>58  | 4793.6<br>5±118.<br>29 | 2644.2<br>94           |
| 22 | 15 | 540-<br>06 07-8 Amyl<br>hexano<br>ate <sup>b</sup>            | 43      | 29379.<br>52±445       | 30894.<br>82±154         | 38975.<br>33±851         | 30213.<br>26±322        | 18706.<br>64±175         | 19456.<br>82±658       | 5760.9<br>4±317.       | 1622.4<br>2±573.       | nd               | nd                    | 398.12<br>±19.06       | 4032.8<br>7±673.        | 7349.1<br>3±234.        | 14234.<br>05±250        | 5233.0<br>9±119.        | 35592.<br>57±104        | 16473.<br>82±75        | 30253.<br>87±702       |
| 23 | 15 | 1882 (2E)-2-<br>05 9- Nonena<br>56-6 l <sup>b</sup>           | 70      | nd                     | 62.84±<br>4.89           | 1399.8<br>±131.6<br>9    | nd                      | 65.17±<br>4.87           | nd                     | 894.84<br>±44.42       | 25.12±<br>13.15        | 144.64<br>±5.64  | nd                    | nd                     | nd                      | 29.13±<br>1.56          | nd                      | nd                      | 1360.7<br>127.          | nd                     | nd                     |
| 24 | 15 | 624-<br>12 13-5 Propyl<br>caprylat<br>e <sup>b</sup>          | 61      | 9107.1<br>1±200.<br>34 | 8628.7<br>9±216.<br>54   | 11755.<br>23±350<br>3.00 | 10068.<br>57±692<br>.41 | 3368.3<br>5±1.17         | 2774.8<br>2±839.<br>31 | 987.59<br>±10.58       | 671.13<br>±29.39       | 194.87<br>±50.91 | 608.92<br>±142.1      | 434.72<br>±81.12       | 1989.6<br>5±167.<br>14  | 3536.2<br>±71.98        | 2814.7<br>4±109.        | 2944.6<br>4±229.        | 10211.<br>48±538<br>.89 | 5288.2<br>±39.84       | 29033.<br>95±552       |
| 25 | 15 | 123-<br>30 29-5 Ethyl<br>nonano<br>ate <sup>b</sup>           | 88      | 44898.<br>25±293       | 40755.<br>21±482         | 41921.<br>32±108         | 40491.<br>35±450        | 39525.<br>05±396         | 32130.<br>98±373       | 28438.<br>54±15        | 34457.<br>49±860       | 3335.4<br>3±729. | 437023.<br>13±78      | 35795.<br>16±720       | 25596.<br>45±378        | 28278.<br>95±125        | 33062.<br>68±835        | 25890.<br>6±1324        | 57628.<br>11±139        | 60538.<br>02±58        | 32400.<br>86±539       |
| 26 | 15 | 112-<br>93 12-9 Undeca<br>none <sup>b</sup>                   | 58      | 5458.5<br>±534.1       | 11510.<br>17±21.<br>11   | 9013.8<br>±236.4<br>2    | 11684.<br>1±1964<br>.26 | 46066.<br>25±396<br>0.56 | 4137.1<br>±523.9<br>0  | 3671.7<br>9±341.<br>83 | 5647.3<br>5±587.<br>85 | 334.92<br>±112.8 | 7146.5<br>9±107.<br>0 | 2623.1<br>±551.2<br>01 | 16159.<br>56±765<br>.76 | 19791.<br>4±1055<br>.33 | 18425.<br>1±2948<br>.90 | 18300.<br>87±915<br>.92 | 14447.<br>56±333<br>.47 | 18960.<br>04±10        | 7726.2<br>1±787.<br>46 |
| 27 | 16 | 6378<br>02 -65- hexano<br>0 ate <sup>b</sup>                  | 11<br>7 | 98242.<br>5±4629       | 87213.<br>89±101         | 88789.<br>94±295         | 65269.<br>97±975        | 55965.<br>94±107         | 79300.<br>22±100       | 25844.<br>57±10        | 6207.4<br>±136.4       | 252.47<br>±189.5 | 2600.2<br>3±962.      | 2195.8<br>8±140.       | 9280.5<br>8±229.        | 24362.<br>44±128        | 33174.<br>71±672        | 21865.<br>31±871        | 67423.<br>92±946        | 33753.<br>54±18        | 53829.<br>02±811       |
| 28 | 16 | 5461 Isobutyl<br>06 -06- octanoa<br>3 te <sup>b</sup>         | 14<br>5 | nd                     | nd                       | nd                       | nd                      | nd                       | nd                     | nd                     | nd                     | nd               | nd                    | nd                     | nd                      | nd                      | nd                      | 276.86<br>±7.86         | nd                      | nd                     | nd                     |
| 29 | 16 | 110-<br>30 38-3 Ethyl<br>decano<br>ate <sup>b</sup>           | 10<br>1 | 31553.<br>29±295       | 30820.<br>14±298         | 27586.<br>79±347         | 23069.<br>43±709        | 35072.<br>16±538         | 23338.<br>06±320       | 17124.<br>72±10        | 41687.<br>83±118       | 18998.<br>14±64  | 42211.<br>88±10       | 37807.<br>34±991       | 20417.<br>31±272        | 21402.<br>74±107        | 24725.<br>4±718         | 21923.<br>87±818        | 25511.<br>54±228        | 34569.<br>15±55        | 52569.<br>39±931       |
| 30 | 16 | 2035<br>50 -99-<br>6 octanoa<br>te <sup>b</sup>               | 70      | 27447.<br>49±119       | 24136.<br>82±497         | 30951.<br>86±862         | 21201.<br>64±409        | 10133.<br>13±196         | 6086.8<br>8±766.       | 3894.6<br>3±166.       | 3000.0<br>5±316.<br>81 | 578.64<br>±19.89 | 2775.6<br>3±144.      | 3081.0<br>9±538.       | 1287.4<br>5±74.7        | 2629.3<br>±326.1        | 3176.2<br>8±453.        | 2800.4<br>8±172.        | 7849.0<br>2±531.        | 4501.0<br>8±396.       | 7891.6<br>±519.2       |
| 31 | 16 | 7664<br>57 9-<br>16-6 trans-4-<br>decenoa<br>te <sup>b</sup>  | 88      | nd                     | nd                       | nd                       | nd                      | nd                       | nd                     | nd                     | nd                     | nd               | nd                    | nd                     | 7233.3<br>4±890.<br>02  | 2313.8<br>3±70.3<br>8   | nd                      | nd                      | 3540.2<br>1±53.6<br>3   | 4864.0<br>3±17.4<br>8  | 3022.2<br>6±341.<br>81 |
| 32 | 17 | 627-<br>33 90-7 Ethyl<br>undeca<br>noate <sup>b</sup>         | 88      | 5488.9<br>2±153.<br>88 | 2990.3<br>2±517.<br>72   | 4279.9<br>8±156.<br>94   | 4013.5<br>5±830.<br>92  | 4037.0<br>7±942.<br>98   | 2074±1<br>25.21        | 1362.9<br>1±140.<br>88 | 1351.5<br>7±25.9<br>1  | 56.77±<br>30.51  | 2122.5<br>2±550.      | 1255.4<br>6±182.       | 1312.5<br>6±169.        | 1425.7<br>9±212.        | 2117.0<br>1±341.        | 1627.5<br>6±126.        | 3221.2<br>8±135.        | 7284.4<br>3±268.       | 3876.7<br>5±128.       |
| 33 | 20 | 2345<br>12 -28- Pentade<br>0 canone <sup>b</sup>              | 58      | nd                     | nd                       | nd                       | nd                      | nd                       | nd                     | nd                     | nd                     | nd               | 296.15<br>±11.51      | 97.36±<br>4.68         | 1393.3<br>7±37.1<br>6   | nd                      | nd                      | nd                      | 7091.8<br>7±73.7<br>0   | nd                     |                        |
| 34 | 17 | 1117<br>99 -55- octanoa<br>1 te <sup>b</sup>                  | 43      | 9825.3<br>±709.7<br>7  | 11523.<br>13±199<br>7.71 | 19117.<br>83±845<br>6.23 | 15068.<br>07±277<br>.64 | 7327.8<br>4±473.<br>25   | 5332.1<br>6±109.<br>42 | 1499.1<br>8±451.<br>51 | 190.62<br>±34.47       | nd               | 130.81<br>±18.37      | 77.39±<br>10.84        | nd                      | nd                      | 629.12<br>±28.41        | nd                      | nd                      | 7±237.<br>03           | nd                     |
| 35 | 18 | 4887<br>06 -30- hexano<br>3 ate <sup>b</sup>                  | 11<br>7 | 8885.9<br>±177.9<br>6  | nd                       | nd                       | nd                      | nd                       | nd                     | nd                     | nd                     | nd               | nd                    | nd                     | 222.8±<br>30.98         | 395.04<br>±11.55        | 267.95<br>±13.98        | 317.12<br>±15.56        | nd                      | nd                     | nd                     |
| 36 | 18 | 106-<br>40 33-2 Ethyl<br>dodeca<br>noate <sup>b</sup>         | 88      | 30594.<br>67±307       | 30234.<br>16±221         | 31434.<br>45±856         | 34210.<br>03±566        | 23813.<br>64±685         | 12706.<br>09±157       | 14390.<br>52±99        | 29057.<br>19±564       | 11311.<br>1±565. | 35918.<br>66±17       | 30806.<br>85±548       | 24161.<br>62±425        | 14545.<br>5±898.        | 24980.<br>02±707        | 16848.<br>15±352        | 18649.<br>31±129        | 59327.<br>3±515        | 40644.<br>78±413       |
| 37 | 19 | 2826<br>35 7-<br>29-0 tridecan<br>oate <sup>b</sup>           | 88      | 650.66<br>±14.23       | 874.67<br>±43.33         | 893.68<br>±36.97         | 704.94<br>±12.82        | 1184.6<br>1±59.3         | nd                     | nd                     | nd                     | nd               | 340.65<br>±17.33      | 34.32±<br>1.16         | 417.44<br>±60.05        | nd                      | 523.33<br>±26.67        | nd                      | nd                      | 2749.7<br>3±133.<br>18 | nd                     |

|    |                 |                                   |    |                    |                    |                    |                  |                   |                   |                    |                        |                  |                    |                    |                    |                    |                   |                    |                   |                    |                   |
|----|-----------------|-----------------------------------|----|--------------------|--------------------|--------------------|------------------|-------------------|-------------------|--------------------|------------------------|------------------|--------------------|--------------------|--------------------|--------------------|-------------------|--------------------|-------------------|--------------------|-------------------|
| 38 | 19 149-37 57-5  | Ethylhexoic acid <sup>b</sup>     | 73 | 580.97<br>±29.48   | 446.27<br>±22.28   | 362.47<br>±18.23   | 453.34<br>±11.01 | 196.37<br>±9.18   | 230.42<br>±46.53  | 205.2±<br>28.65    | 413.99<br>±10.89       | 208.75<br>±10.17 | nd                 | 319.38<br>±14.27   | 109.88<br>±27.74   | 154.38<br>±77.19   | 140.2±<br>10.89   | 196.21<br>±8.42    | 187.58<br>±12.21  | 358.8±<br>18.70    | 442.05<br>±12.30  |
| 39 | 19 112-52 53-8  | Dodecanol <sup>b</sup>            | 55 | 525.93<br>±61.06   | 1593.8<br>5±820.01 | 362.47<br>±18.23   | 599.67<br>±51.04 | 1798.4<br>7±86.45 | 864.01<br>±14.50  | 2111.0<br>9±938.45 | 1138.8<br>4±374.5      | 710.28<br>±54.38 | 924.67<br>±25.87   | 648.16<br>±14.90   | 766.71<br>±25.96   | 1194.7<br>3±232.22 | 1617.6<br>2±66.61 | 1353.7<br>7±315.92 | 2315.5<br>±462.45 | 1197.6<br>4±74.55  | 1515.4<br>4±38.99 |
| 40 | 20 110-23 27-0  | Isopropyl Myristate <sup>b</sup>  | 43 | nd                 | 203.83<br>±60.12   | 77.14±<br>3.57     | 77.23±<br>11.43  | 352.5±<br>16.99   | 108.21<br>±54.11  | 164.5±<br>10.6     | nd                     | 68.65±<br>3.32   | 259.45<br>±12.73   | 333.13<br>±16.57   | 133.09<br>±61.61   | 107.05<br>±45.74   | 149.75<br>±7.36   | 104.06<br>±4.12    | 205.54<br>±3.60   | nd                 | 301.37<br>±58.52  |
| 41 | 20 124-40 06-1  | Ethyl tetradecanoate <sup>b</sup> | 88 | 20927.<br>64±432   | 33149.<br>49±731   | 28769.<br>4±7828   | 31405.<br>88±540 | 30463.<br>61±864  | 5951.0<br>9±401.4 | 6455.2<br>4±668.8  | 5771.9<br>8±667.173.45 | 11169.<br>8±311  | 3397.6<br>1±403.65 | 21894.<br>±481     | 13361.<br>11±11007 | 25654.<br>±35707   | 16287.<br>±155    | 3662.4<br>±238.1   | 11410<br>9.39±1   | 21965.<br>01±100   |                   |
| 42 | 21 4111-39 00-5 | Ethyl pentadecanoate <sup>b</sup> | 88 | 1188.3<br>8±148.88 | 2463.8<br>±123.90  | 2657.2<br>7±132.63 | 1278.9<br>5±7.87 | 1716.8<br>±545.27 | nd                | nd                 | 208±17.06              | 987.92<br>±37.89 | nd                 | 4349.6<br>±107.66  | 1542.8<br>nd       | ±113.34            | nd                | nd                 | 5±913.45          | 2432.5<br>4±121.27 |                   |
| 43 | 22 628-42 97-7  | Ethyl hexadecanoate <sup>b</sup>  | 88 | 37103.<br>36±943   | 53478.<br>93±899   | 43867.<br>86±215   | 50437.<br>1±5245 | 40107.<br>55±826  | 15548.<br>46±200  | 15368.<br>81±39    | 12696.<br>8±1667       | 4422.4<br>2±106  | 432442.<br>45±97   | 8045.3<br>2±108.39 | 83727.<br>±11637   | 13348.<br>±13325   | 39458.<br>±16446  | 12299.<br>±122     | 8825.1<br>6±996.  | 87625.<br>54±63    | 41685.<br>52±716  |

<sup>a</sup>These compounds were quantitated by GC-FID.

<sup>b</sup>These compounds were quantitated by GC × GC-TOFMS/ head-space analysis.

**Table S5.** Quantitative analysis of the 14 potential compounds which may contribute to sweetness of Baijiu in sample S1 that diluted to 50% ethanol content.

| No. | CAS       | RI (FFAP) | compound                             | Liner threshold (ug·L <sup>-1</sup> ) | M/Z | Slope  | Intercept | Coefficient of determination | LOQ (ng·L <sup>-1</sup> ) | LOD (ng·L <sup>-1</sup> ) | Accuracy (%) | Concentration (mg·L <sup>-1</sup> ) |
|-----|-----------|-----------|--------------------------------------|---------------------------------------|-----|--------|-----------|------------------------------|---------------------------|---------------------------|--------------|-------------------------------------|
| 1   | 539-82-2  | 1136      | Ethyl pentanoate <sup>1</sup>        | 7250.00-232000.00                     | —   | 1.3042 | 0.0016    | 0.9996                       | —                         | —                         | 99.41        | 59.40±0.00                          |
| 2   | 123-66-0  | 1253      | Ethyl hexanoate <sup>1</sup>         | 39040-9993000                         | —   | 1.4763 | 0.0533    | 0.9999                       | —                         | —                         | 99.55        | 2172.72±0.19                        |
| 3   | 1117-55-1 | 1798      | Hexyl octanoate <sup>2</sup>         | 110.61-14850.60                       | 84  | 0.2630 | -0.1021   | 0.9918                       | —                         | —                         | 114.38       | 4.15±0.13                           |
| 4   | 108-64-5  | 1058      | Ethyl 3-methylbutanoate <sup>2</sup> | 150.94-20400.00                       | 88  | 0.1035 | -0.0169   | 0.9968                       | 2396.69                   | 719.01                    | 102.15       | 16.09±0.85                          |
| 5   | 106-30-9  | 1343      | Ethyl heptanoate <sup>1</sup>        | 25900.00-485000.00                    | —   | 1.3013 | 0.0169    | 1                            | 2863.31                   | 858.99                    | 99.98        | 40.01±0.00                          |
| 6   | 106-27-4  | 1291      | Isoamyl butanoate <sup>2</sup>       | 10.59-4080.00                         | 71  | 0.3214 | -0.0240   | 0.9934                       | —                         | —                         | 102.75       | 2.50±0.12                           |
| 7   | 6378-65-0 | 1601      | Hexyl hexanoate <sup>2</sup>         | 2060.25-132000.00                     | 117 | 0.1488 | -0.5738   | 0.9962                       | 646.34                    | 193.90                    | 100.38       | 113.58±3.84                         |
| 8   | 2035-99-6 | 1650      | Isoamyl octanoate <sup>2</sup>       | 78.60-10062.10                        | 127 | 0.5528 | -0.1247   | 0.9916                       | 24320.76                  | 7296.23                   | 117.29       | 2.01±0.02                           |
| 9   | 105-79-3  | 1357      | Isobutyl hexanoate <sup>2</sup>      | 160.24-10390.20                       | 99  | 0.3911 | -0.1138   | 0.9942                       | 28071.43                  | 8421.43                   | 92.99        | 6.13±0.30                           |
| 10  | 105-54-4  | 1028      | Ethyl butanoate <sup>1</sup>         | 6650.00-850750.00                     | —   | 1.3013 | 0.0169    | 0.9982                       | 4891.57                   | 1467.47                   | 98.63        | 225.76±0.03                         |
| 11  | 2198-61-0 | 1459      | Isoamyl hexanoate <sup>2</sup>       | 6975.00-223200                        | 70  | 0.2933 | -0.4314   | 0.9979                       | —                         | —                         | 113.28       | 46.42±2.03                          |
| 12  | 106-32-1  | 1434      | Ethyl octanoate <sup>1</sup>         | 13760.00-440250.00                    | —   | 1.4974 | -0.0144   | 0.9998                       | 52848.49                  | 15854.55                  | 100.19       | 76.89±0.01                          |
| 13  | 124-13-0  | 1300      | Octanal <sup>2</sup>                 | 4.54-2317.91                          | 43  | 0.1516 | 0.0864    | 0.9963                       | —                         | —                         | 100.06       | 1.98±0.13                           |
| 14  | 540-07-8  | 1509      | Amyl hexanoate <sup>2</sup>          | 3875.50-31000.00                      | 70  | 0.1275 | -0.0791   | 0.9903                       | 11.15                     | 3.35                      | 109.89       | 10.76±0.33                          |

<sup>1</sup> These compounds were quantified by GC-FID.

<sup>2</sup> These compounds were quantified by GC-MS/head-space analysis.
